# Supplementary material
Source: publisher site journal article supplement (https://www.dovepress.com/article/302450)
Supplement: Supplementary file 1 [file get_supplementary_file.php]

**Supplementary materials**

**Supplementary Figure S1**


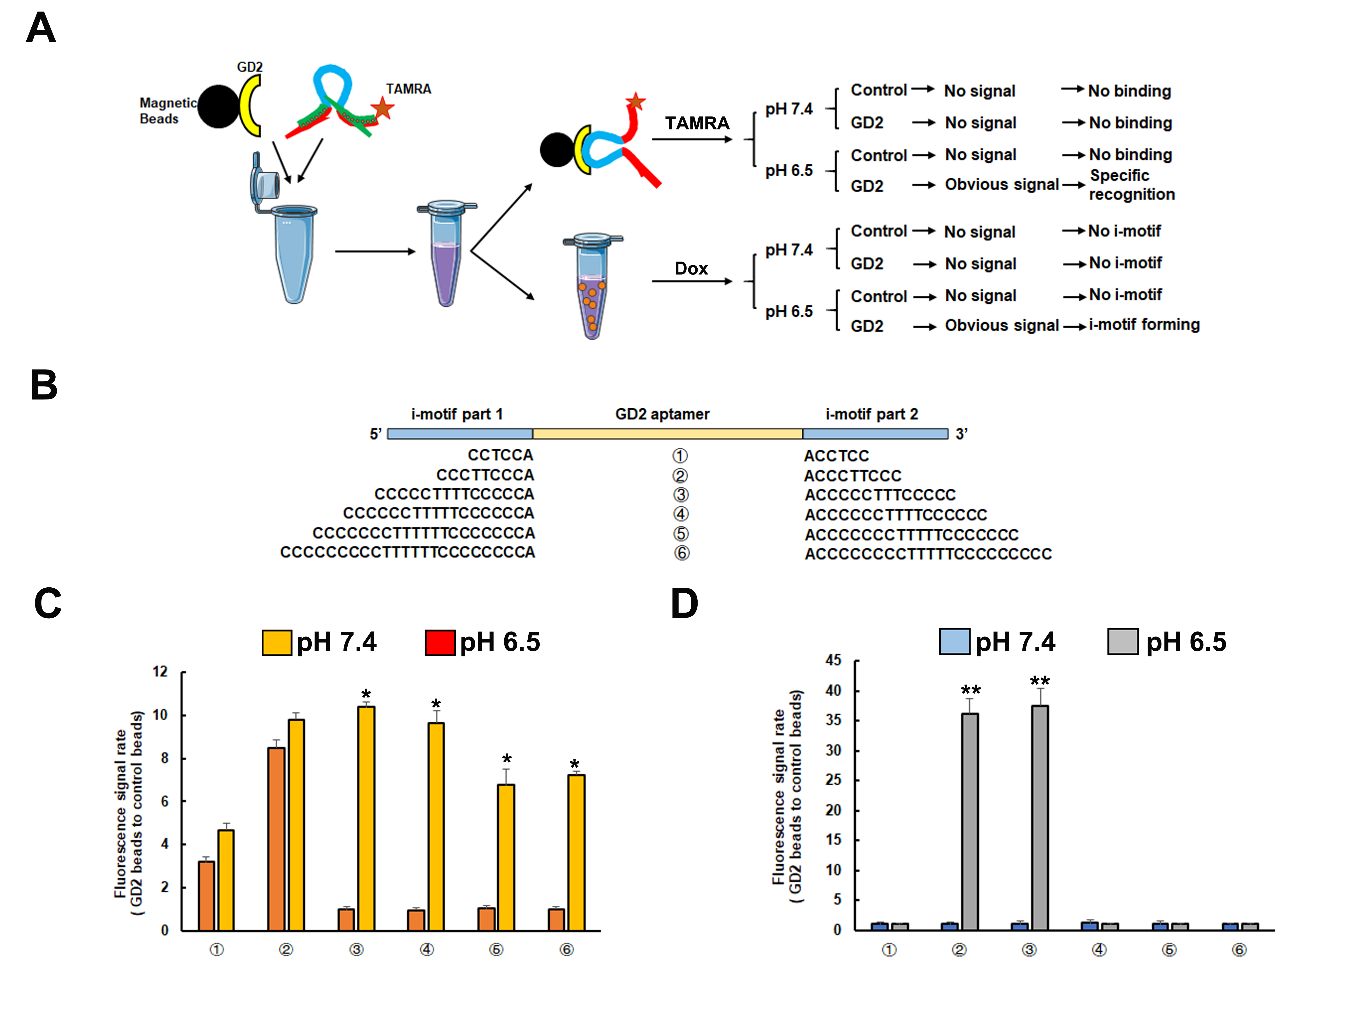


**Supplementary Figure S1**. Construction of i-motif. (A) Method to select a combination of aptamer and i-motif to achieve a goal that Dox will be released only in acidic environment and presence of GD2. In brief, GD2 was fixed on magnetic beads. GD2 aptamer with i-motif sequence labeled with TAMRA was incubated with beads at pH 7.4 or 6.5. Beads was separated and evaluated by flow cytometry, and fluorescence intensity of Dox in supernatant fluid was detected. The complex which could only recognize GD2 and release Dox in acidic environment was chosen for further study. (B) Different combination of GD2 and i-motif sequences. (C) GD2 binding ability of different combination. Data was presented as a ratio (GD2 group to control group). (The difference compared with pH 7.4 group was labeled with *, *p<0.05). (D) i-motif formation and Dox reseals of different combination. Data was presented as a ratio (GD2 group to control group). (The difference compared with pH 7.4 group was labeled with *, **p<0.01).

**Supplementary Figure S2**


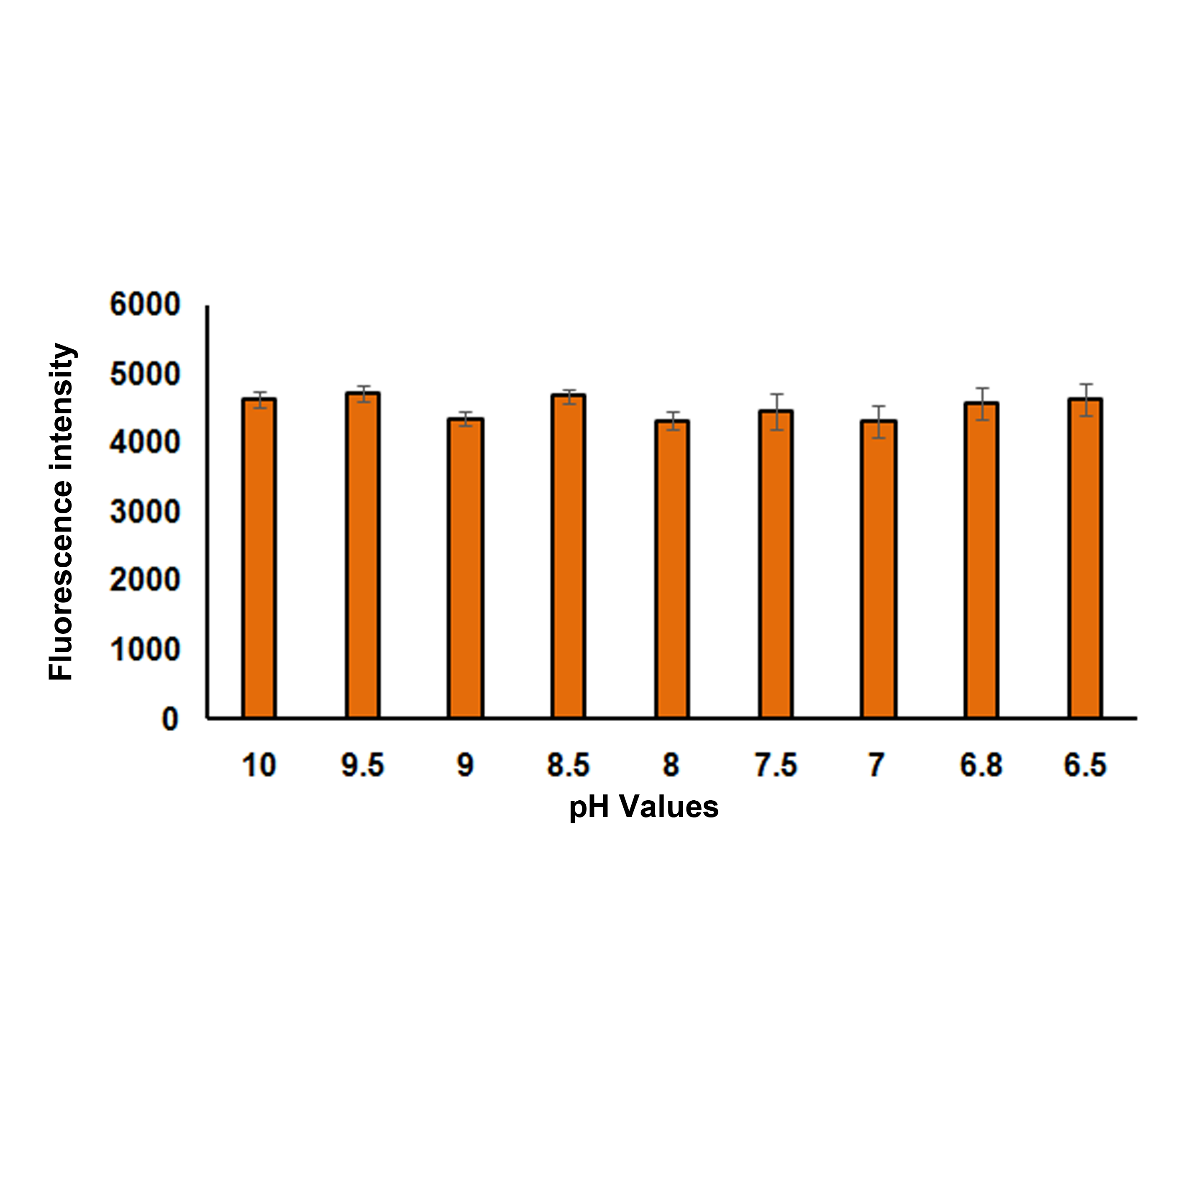


**Supplementary Figure S2**. Fluorescence intensity of C-Targeted in different pH values.

**Supplementary Figure S3**


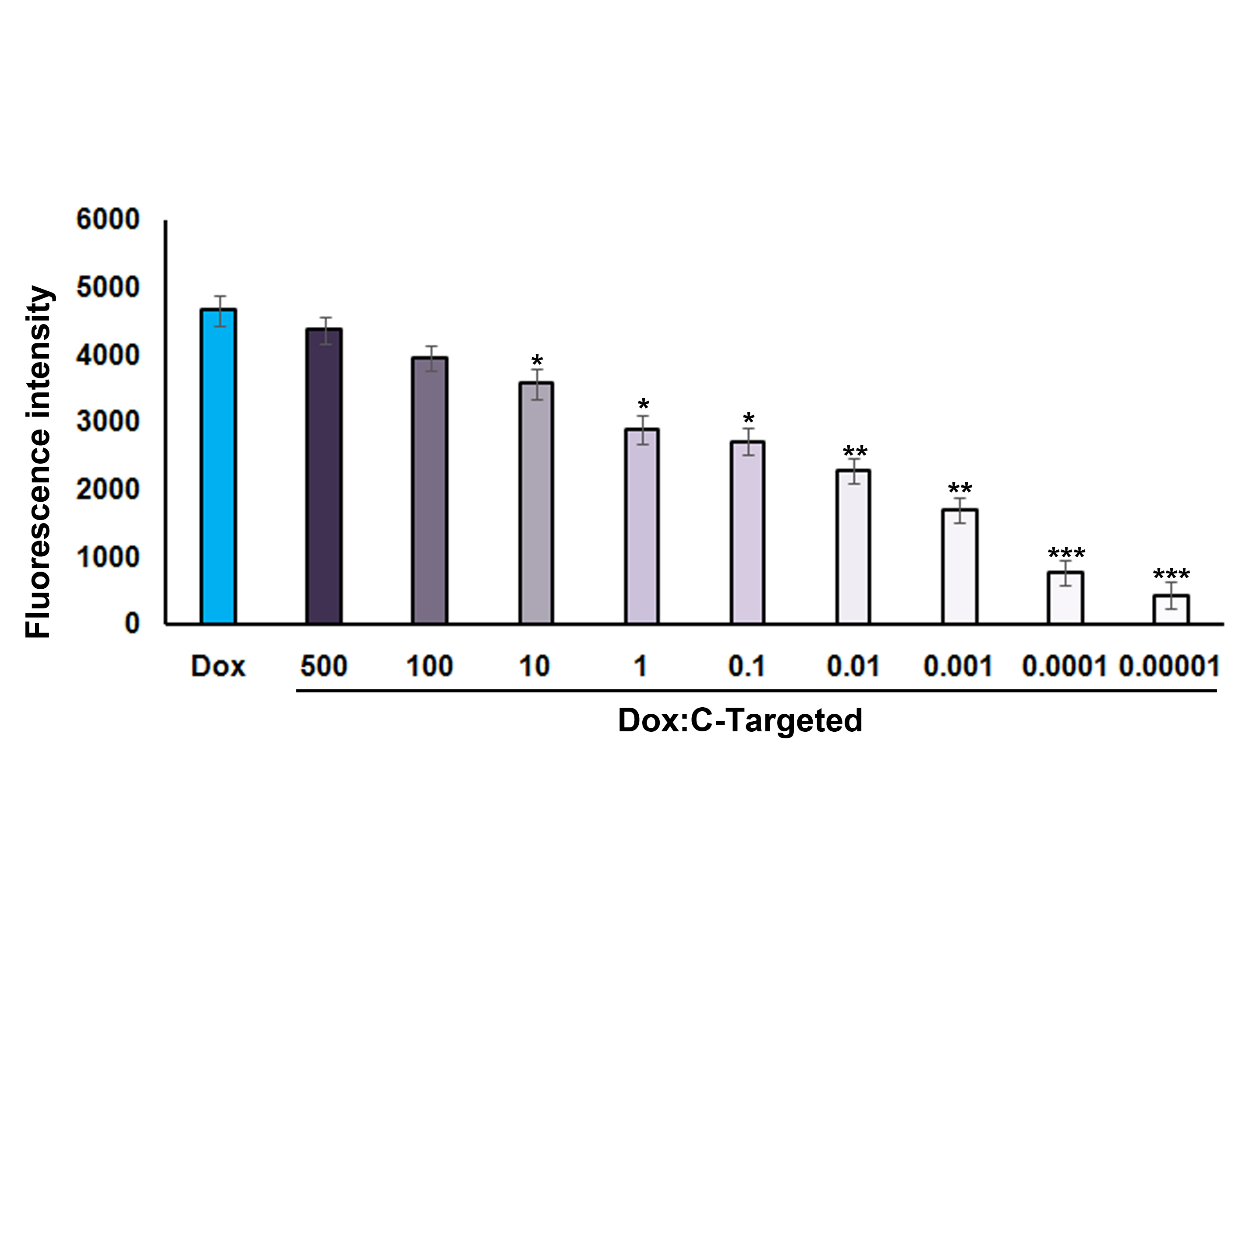


**Supplementary Figure S3**. Fluorescence intensity of doxorubicin solution (5 nM) with increasing molar ratios of the C-Targeted (The difference compared with free Dox group was labeled with *, *p<0.05, **p<0.01, ***p<0.001).

**Supplementary Figure S4**


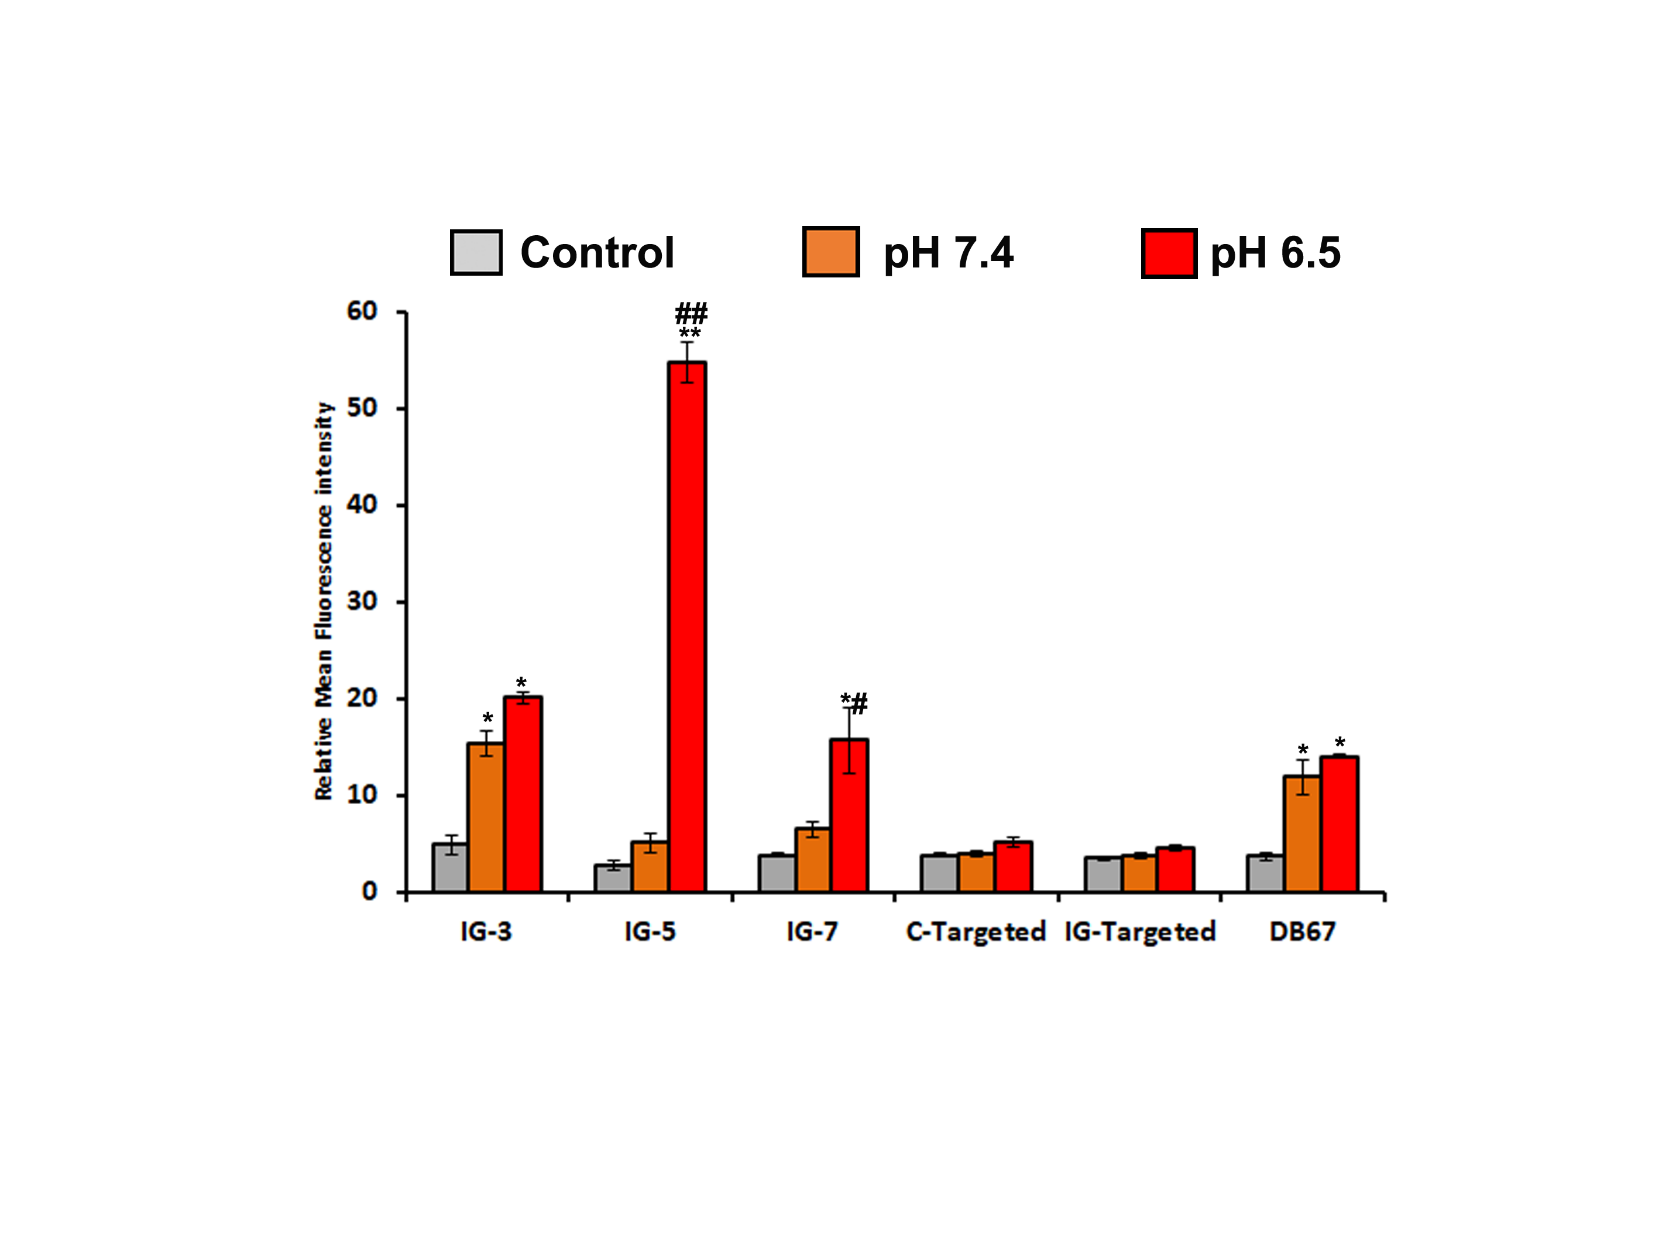


**Supplementary Figure S4.** GD2 binding ability evaluation. Mean fluorescence intensity of sequences was calculated. (The difference compared with control group was labeled with *, *p < 0.05, **p < 0.01; The difference compared with pH 7.4 group was labeled with #, #p < 0.05, ##p < 0.01).

**Supplementary Figure S5**


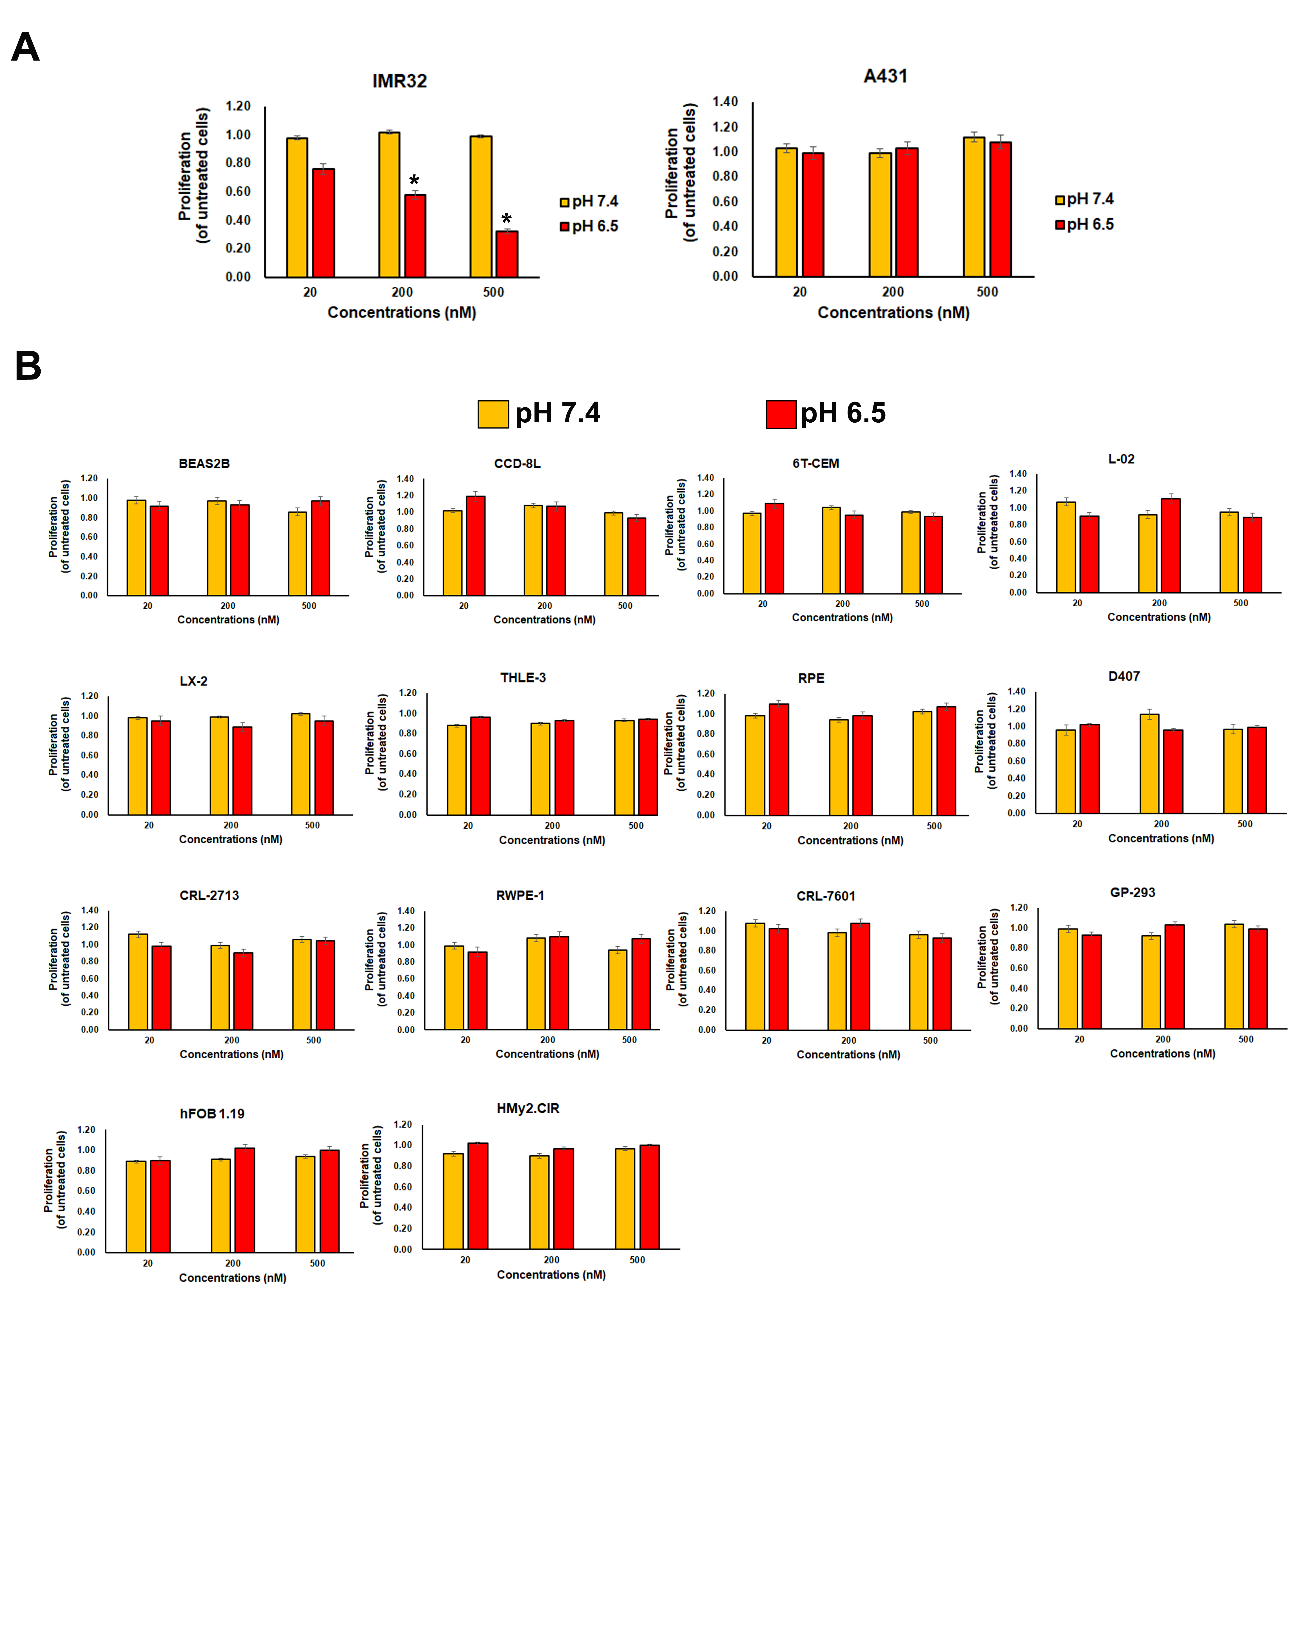


**Supplementary Figure S5.** Cell proliferation evaluated by BrdU ELISA. (A) Cell proliferations of tumor cells. (B) Cell proliferations of normal cells. (The difference compared with pH 7.4 group was labeled with *, *p < 0.05).
